# Supplementary material for: Evaluation of photo-reactive siderophore producing bacteria before, during and after a bloom of the dinoflagellate Lingulodinium polyedrum
Source: Royal Society of Chemistry journal article supplement (doi:10.1039/c4mt00053f), 2014-01-01
Supplement: c4mt00053f1.pdf [file c4mt00053f1.pdf]

Supplementary Material  
for

Evaluation of Photo-reactive Siderophore Producing Bacteria  
Before, During and After a Bloom of the Dinoflagellate  
*Lingulodinium polyedrum*.

Kyoko Yarimizu<sup>†</sup>, Geraldine Polido<sup>†</sup>, Astrid Gärdes<sup>†‡</sup>, Melissa L. Carter<sup>‡</sup>, Mary  
Hilbern<sup>‡</sup>, and Carl J. Carrano<sup>\*†</sup>

<sup>†</sup>Department of Chemistry & Biochemistry, San Diego State University, San  
Diego, CA 92182

and

<sup>‡</sup>Scripps Institution of Oceanography, San Diego, CA 92093

Figure S1. Environment Distance Matrix

|         | 0         | 0         | 0         | 0         | 0         | 0         |
|---------|-----------|-----------|-----------|-----------|-----------|-----------|
|         | ·         | ·         | ·         | ·         | ·         | ·         |
|         | 2         | 2         | 2         | 8         | 8         | 8         |
|         | u         | u         | u         | u         | u         | u         |
|         | m         | m         | m         | m         | m         | m         |
|         | $\bar{B}$ | $\bar{E}$ | $\bar{M}$ | $\bar{B}$ | $\bar{E}$ | $\bar{M}$ |
| 0.2um_B |           | 0.8327    | 0.7845    | 0.7946    | 0.6889    | 0.7713    |
| 0.2um_E |           |           | 0.5781    | 0.5275    | 0.5269    | 0.6668    |
| 0.2um_M |           |           |           | 0.2461    | 0.3832    | 0.3631    |
| 0.8um_B |           |           |           |           | 0.2544    | 0.3727    |
| 0.8um_E |           |           |           |           |           | 0.4870    |
| 0.8um_M |           |           |           |           |           |           |

**Color Description**

- (0-25%) Lower quartile
- (25-50%)
- (50-75%)
- (75-100%) Upper quartile

**Figure S2.** UniFrac Significance Test

|         | 0<br>·<br>2<br>u<br>m<br>B̄ | 0<br>·<br>2<br>u<br>m<br>Ē | 0<br>·<br>2<br>u<br>m<br>M̄ | 0<br>·<br>8<br>u<br>m<br>B̄ | 0<br>·<br>8<br>u<br>m<br>Ē | 0<br>·<br>8<br>u<br>m<br>M̄ |
|---------|-----------------------------|-----------------------------|-----------------------------|-----------------------------|-----------------------------|-----------------------------|
| 0.2um_B |                             | 0.0400                      | 0.0400                      | 0.0600                      | 0.1300                      | 0.1000                      |
| 0.2um_E |                             |                             | 0.0700                      | 0.3000                      | 0.1400                      | 0.0800                      |
| 0.2um_M |                             |                             |                             | 0.7000                      | 0.2800                      | 0.3200                      |
| 0.8um_B |                             |                             |                             |                             | 0.8500                      | 0.1400                      |
| 0.8um_E |                             |                             |                             |                             |                             | 0.1300                      |
| 0.8um_M |                             |                             |                             |                             |                             |                             |

**Color Description**

- (< 0.001) Highly significant
- (0.001-0.01) Significant
- (0.01-0.05) Marginally significant
- (0.05-0.1) Suggestive
- (> 0.1) Not significant

**Figure S3.** UniFrac Principal Coordinates Analysis (PCA).

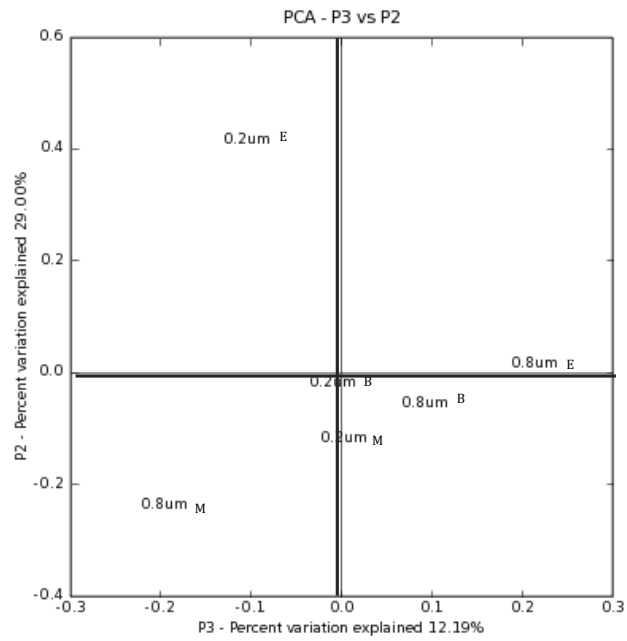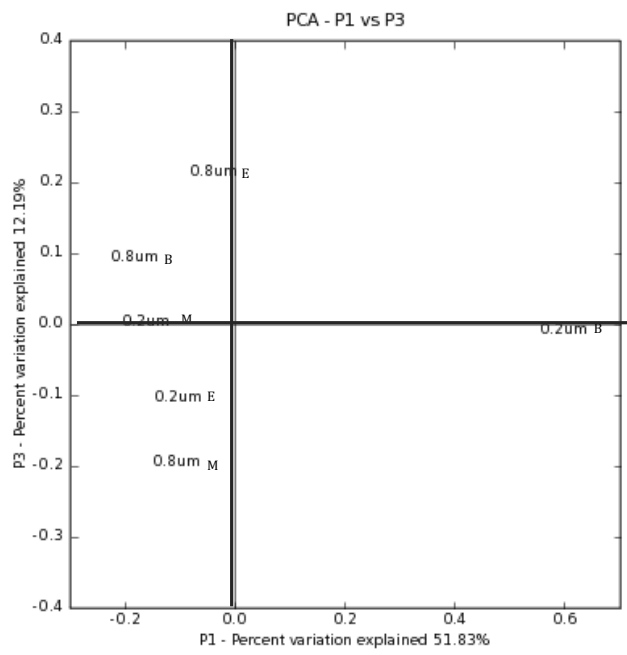

**Table S1.** Free-Living (0.2 µm membrane) *I6S* Containing Bacteria Gene Copy Number

| Time Point | Ct    | SQ     | Dilution Factor | SQ x Dilution Factor | SQ (filtration correction) | Gene Copy/ L | Mean Gene Copy /L* |
|------------|-------|--------|-----------------|----------------------|----------------------------|--------------|--------------------|
| 2011/7/28  | 37.05 | 0.0062 | 500             | 3.11                 | 5.31                       | 1.7E+09      | 1.8E+09            |
|            | 36.95 | 0.0067 | 500             | 3.33                 | 5.69                       | 1.8E+09      |                    |
| 2011/9/23  | 35.87 | 0.0134 | 500             | 6.70                 | 17.77                      | 5.7E+09      | 5.6E+09            |
|            | 35.92 | 0.0130 | 500             | 6.50                 | 17.24                      | 5.5E+09      |                    |
| 2011/10/2  | 33.50 | 0.0620 | 500             | 31.00                | 65.96                      | 2.1E+10      | 2.2E+10            |
|            | 33.40 | 0.0661 | 500             | 33.05                | 70.32                      | 2.3E+10      |                    |
| 2011/10/5  | 38.31 | 0.0028 | 500             | 1.38                 | 2.22                       | 7.1E+08      | 8.5E+08            |
|            | 37.82 | 0.0038 | 500             | 1.90                 | 3.05                       | 9.8E+08      |                    |
| 2011/10/9  | 32.46 | 0.1220 | 20              | 2.44                 | 4.98                       | 1.6E+09      | 1.6E+09            |
|            | 32.37 | 0.1290 | 20              | 2.58                 | 5.27                       | 1.7E+09      |                    |
| 2011/10/12 | 30.14 | 0.5470 | 20              | 10.94                | 17.50                      | 5.6E+09      | 5.2E+09            |
|            | 30.41 | 0.4590 | 20              | 9.18                 | 14.69                      | 4.7E+09      |                    |
| 2011/10/19 | 40.20 | 0.0008 | 20              | 0.02                 | 0.03                       | 8.9E+06      | 1.2E+07            |
|            | 39.36 | 0.0014 | 20              | 0.03                 | 0.05                       | 1.5E+07      |                    |
| 2011/10/30 | 36.74 | 0.0076 | 20              | 0.15                 | 0.21                       | 6.9E+07      | 7.1E+07            |
|            | 36.65 | 0.0081 | 20              | 0.16                 | 0.23                       | 7.3E+07      |                    |

The average dsDNA MW is assumed here to be 650 for marine bacteria. The genome size of free-living bacteria is assumed to be 1.6MB. The average genome mass of free living bacteria is thus  $650 \times 1.6 \text{ MB} / (6.022 \times 10^{23}) = 1.727 \times 10^{-6} \text{ ng/genome}$ . For the free living fraction, there are average of  $1.8 \times 10^3$  16S rRNA copies per genome. Thus, the gene copy number /mL sample =  $\text{SQ in ng/mL} / (1.727 \times 10^{-6}) / 1.8$ . The Gene copy number was then converted to per L (x1000).

**Table S2.** Particle Associated (0.8 µm membrane) *16S* Containing Bacteria Gene Copy Number

| Time Point | Ct    | SQ     | Dilution Factor | SQ x Dilution Factor | SQ (filtration correction) | Gene Copy/ L | Mean Gene Copy /L* |
|------------|-------|--------|-----------------|----------------------|----------------------------|--------------|--------------------|
| 2011/7/28  | 35.24 | 0.0202 | 500             | 10.10                | 17.25                      | 3.0E+09      | 2.7E+09            |
|            | 35.49 | 0.0171 | 500             | 8.55                 | 14.60                      | 2.5E+09      |                    |
| 2011/9/23  | 33.29 | 0.0712 | 500             | 35.60                | 94.40                      | 1.6E+10      | 1.5E+10            |
|            | 33.46 | 0.0638 | 500             | 31.90                | 84.59                      | 1.5E+10      |                    |
| 2011/10/2  | 31.10 | 0.2930 | 500             | 146.50               | 294.68                     | 5.1E+10      | 5.2E+10            |
|            | 31.02 | 0.3080 | 500             | 154.00               | 309.77                     | 5.3E+10      |                    |
| 2011/10/5  | 33.92 | 0.0472 | 500             | 23.60                | 37.96                      | 6.5E+09      | 7.3E+09            |
|            | 33.58 | 0.0591 | 500             | 29.55                | 47.53                      | 8.2E+09      |                    |
| 2011/10/9  | 27.44 | 3.1500 | 50              | 157.50               | 306.25                     | 5.3E+10      | 5.5E+10            |
|            | 27.28 | 3.4900 | 50              | 174.50               | 339.31                     | 5.8E+10      |                    |
| 2011/10/12 | 34.58 | 0.0308 | 50              | 1.54                 | 2.46                       | 4.2E+08      | 4.0E+08            |
|            | 34.80 | 0.0268 | 50              | 1.34                 | 2.14                       | 3.7E+08      |                    |
| 2011/10/19 | 34.24 | 0.0384 | 50              | 1.92                 | 3.27                       | 5.6E+08      | 5.4E+08            |
|            | 34.39 | 0.0349 | 50              | 1.75                 | 2.97                       | 5.1E+08      |                    |
| 2011/10/30 | 26.45 | 5.9700 | 50              | 298.50               | 409.47                     | 7.0E+10      | 6.8E+10            |
|            | 26.54 | 5.6100 | 50              | 280.50               | 384.77                     | 6.6E+10      |                    |

The average dsDNA MW is assumed to be 650 for marine bacteria. The genome size of particle associated bacteria is 3.0 MB. The average genome mass of particle associated bacteria is thus  $650 \times 3.0 \text{ MB} / (6.022 \times 10^{23}) = 3.238 \times 10^{-6} \text{ ng/genome}$ . For the particle associated fraction, there are average of 1.8 x 16SrRNA copies per genome. Thus, the gene copy number /mL sample =  $\text{SQ in ng/mL} / (3.238 \times 10^{-6}) / 1.8$ . The Gene copy number was then converted to per L (x1000).

**Table S3.** Free-Living (0.2 µm membrane) *pvsB* Containing Bacteria Gene Copy Number

| Time Point | Ct    | SQ     | SQ (filtration correction) | Gene Copy /L | Mean Gene Copy /L* |
|------------|-------|--------|----------------------------|--------------|--------------------|
| 2011/7/28  | 28.47 | 0.0281 | 0.0480                     | 9.9E+06      | 1.0E+07            |
|            | 28.43 | 0.0285 | 0.0487                     | 1.0E+07      |                    |
|            | 28.30 | 0.0299 | 0.0511                     | 1.1E+07      |                    |
| 2011/9/23  | 30.43 | 0.0135 | 0.0358                     | 7.4E+06      | 7.2E+06            |
|            | 30.56 | 0.0129 | 0.0342                     | 7.1E+06      |                    |
|            | 30.53 | 0.0130 | 0.0345                     | 7.1E+06      |                    |
| 2011/10/2  | 25.22 | 0.0940 | 0.2000                     | 4.1E+07      | 4.3E+07            |
|            | 25.07 | 0.0997 | 0.2121                     | 4.4E+07      |                    |
|            | 25.11 | 0.0982 | 0.2089                     | 4.3E+07      |                    |
| 2011/10/5  | 29.67 | 0.0180 | 0.0290                     | 6.0E+06      | 4.2E+06            |
|            | 31.22 | 0.0101 | 0.0162                     | 3.4E+06      |                    |
|            | 31.42 | 0.0094 | 0.0151                     | 3.1E+06      |                    |
| 2011/10/9  | 29.77 | 0.0173 | 0.0353                     | 7.3E+06      | 7.1E+06            |
|            | 30.15 | 0.0150 | 0.0306                     | 6.3E+06      |                    |
|            | 29.64 | 0.0181 | 0.0369                     | 7.6E+06      |                    |
| 2011/10/12 | 28.34 | 0.0294 | 0.0470                     | 9.7E+06      | 8.7E+06            |
|            | 28.82 | 0.0246 | 0.0394                     | 8.1E+06      |                    |
|            | 28.79 | 0.0249 | 0.0398                     | 8.2E+06      |                    |
| 2011/10/19 | 35.43 | 0.0021 | 0.0036                     | 7.4E+05      | 4.3E+05            |
|            | 38.39 | 0.0007 | 0.0012                     | 2.5E+05      |                    |
|            | 37.72 | 0.0009 | 0.0015                     | 3.2E+05      |                    |
| 2011/10/30 | 36.56 | 0.0014 | 0.0019                     | 4.0E+05      | 8.5E+05            |
|            | 34.11 | 0.0034 | 0.0048                     | 1.0E+06      |                    |
|            | 33.69 | 0.0040 | 0.0056                     | 1.2E+06      |                    |

The average dsDNA MW for DG893 is 660. The genome size of DG893 is 4.41MB. The genome mass of DG893 is thus  $660 \times 4.41 \text{ MB} / (6.022 \times 10^{23}) = 4.833 \times 10^{-6} \text{ ng/genome}$ . The gene copy number /mL sample =  $\text{SQ in ng/mL} / (4.833 \times 10^{-6})$ . The Gene copy number was then converted to per L (x1000).

**Table S4.** Particle Associated (0.8  $\mu\text{m}$  membrane) *pvsB* Containing Bacteria Gene Copy Number

| Time Point | Ct    | SQ     | SQ (filtration correction) | Gene Copy/ L | Mean Gene Copy /L* |
|------------|-------|--------|----------------------------|--------------|--------------------|
| 2011/7/28  | 24.72 | 0.1130 | 0.1930                     | 4.0E+07      | 3.9E+07            |
|            | 24.78 | 0.1110 | 0.1895                     | 3.9E+07      |                    |
|            | 24.82 | 0.1090 | 0.1861                     | 3.9E+07      |                    |
| 2011/9/23  | 26.21 | 0.0651 | 0.1726                     | 3.6E+07      | 3.5E+07            |
|            | 26.26 | 0.0639 | 0.1694                     | 3.5E+07      |                    |
|            | 26.21 | 0.0650 | 0.1724                     | 3.6E+07      |                    |
| 2011/10/2  | 20.99 | 0.4550 | 0.9152                     | 1.9E+08      | 1.8E+08            |
|            | 21.17 | 0.4250 | 0.8549                     | 1.8E+08      |                    |
|            | 21.21 | 0.4190 | 0.8428                     | 1.7E+08      |                    |
| 2011/10/5  | 25.47 | 0.0857 | 0.1379                     | 2.9E+07      | 2.8E+07            |
|            | 25.66 | 0.0798 | 0.1284                     | 2.7E+07      |                    |
|            | 25.45 | 0.0865 | 0.1391                     | 2.9E+07      |                    |
| 2011/10/9  | 22.01 | 0.3120 | 0.6067                     | 1.3E+08      | 1.2E+08            |
|            | N/A   | 0.0000 | 0.0000                     | 0.0E+00      |                    |
|            | 22.47 | 0.2620 | 0.5094                     | 1.1E+08      |                    |
| 2011/10/12 | 27.13 | 0.0463 | 0.0741                     | 1.5E+07      | 1.2E+07            |
|            | 29.58 | 0.0185 | 0.0296                     | 6.1E+06      |                    |
|            | 27.36 | 0.0424 | 0.0678                     | 1.4E+07      |                    |
| 2011/10/19 | 25.62 | 0.0810 | 0.1380                     | 2.9E+07      | 2.7E+07            |
|            | 25.89 | 0.0735 | 0.1252                     | 2.6E+07      |                    |
|            | 25.89 | 0.0734 | 0.1250                     | 2.6E+07      |                    |
| 2011/10/30 | 21.32 | 0.4020 | 0.5514                     | 1.1E+08      | 1.1E+08            |
|            | 21.39 | 0.3920 | 0.5377                     | 1.1E+08      |                    |
|            | 21.33 | 0.4000 | 0.5487                     | 1.1E+08      |                    |

The average dsDNA MW of *DG893* is 660. The genome size of *DG893* 4.41MB. The genome mass of *DG893* is thus  $660 \times 4.41 \text{ MB} / (6.022 \times 10^{23}) = 4.833 \times 10^{-6} \text{ ng/genome}$ . The gene copy number /mL sample =  $\text{SQ in ng/mL} / (4.833 \times 10^{-6})$ . The Gene copy number was then converted to per L ( $\times 1000$ ). The red highlight is apparent outlier and eliminated from analysis. The red highlight is apparent outlier and eliminated from analysis.



**Table S5.** Free-Living (0.2 µm membrane) *vibXII* Containing Bacteria Gene Copy Number

| Time Point | Ct    | SQ     | SQ (filtration correction) | Gene Copy/L | Mean Gene Copy /L* |
|------------|-------|--------|----------------------------|-------------|--------------------|
| 2011/7/28  | 35.58 | 0.1210 | 0.2066                     | 1.2E+08     | 1.2E+08            |
|            | 35.31 | 0.1420 | 0.2425                     | 1.4E+08     |                    |
|            | 36.08 | 0.0893 | 0.1525                     | 8.8E+07     |                    |
| 2011/9/23  | 38.65 | 0.0189 | 0.0501                     | 2.9E+07     | 3.1E+07            |
|            | 38.39 | 0.0220 | 0.0583                     | 3.4E+07     |                    |
|            | 38.54 | 0.0202 | 0.0536                     | 3.1E+07     |                    |
| 2011/10/2  | 33.26 | 0.4880 | 1.0383                     | 6.0E+08     | 6.5E+08            |
|            | 33.22 | 0.5000 | 1.0638                     | 6.2E+08     |                    |
|            | 32.93 | 0.5990 | 1.2745                     | 7.4E+08     |                    |
| 2011/10/5  | 38.12 | 0.0260 | 0.0418                     | 2.4E+07     | 1.5E+07            |
|            | 39.25 | 0.0131 | 0.0211                     | 1.2E+07     |                    |
|            | 39.64 | 0.0104 | 0.0167                     | 9.7E+06     |                    |
| 2011/10/9  | 37.71 | 0.0333 | 0.0680                     | 3.9E+07     | 4.4E+07            |
|            | 37.39 | 0.0405 | 0.0827                     | 4.8E+07     |                    |
|            | 37.48 | 0.0382 | 0.0780                     | 4.5E+07     |                    |
| 2011/10/12 | 35.28 | 0.1440 | 0.2304                     | 1.3E+08     | 1.2E+08            |
|            | 35.47 | 0.1290 | 0.2064                     | 1.2E+08     |                    |
|            | 35.64 | 0.1160 | 0.1856                     | 1.1E+08     |                    |
| 2011/10/19 | N/A   | 0.0000 | 0.0000                     | 0.0E+00     | 0.0E+00            |
|            | N/A   | 0.0000 | 0.0000                     | 0.0E+00     |                    |
|            | N/A   | 0.0000 | 0.0000                     | 0.0E+00     |                    |
| 2011/10/30 | 39.69 | 0.0100 | 0.0140                     | 8.1E+06     | 4.6E+06            |
|            | 41.76 | 0.0029 | 0.0040                     | 2.3E+06     |                    |
|            | 41.13 | 0.0042 | 0.0059                     | 3.4E+06     |                    |

The average dsDNA MW used here was 650 . The genome size of free-living bacteria was assumed to be 1.6MB. The average genome mass of free living bacteria is thus  $650 \times 1.6 \text{ MB} / (6.022 \times 10^{-23}) = 1.727 \times 10^{-6} \text{ ng/genome}$ . The gene copy number /mL sample =  $\text{SQ in ng/mL} / (1.727 \times 10^{-6})$ . The Gene copy number was then converted to per L ( $\times 1000$ ). The red highlight is apparent outlier and eliminated from analysis.

**Table S6.** Particle Associated (0.8  $\mu\text{m}$  membrane) *vibXII* Containing Bacteria Gene Copy Number

| Time Point | Ct    | SQ     | SQ (filtration correction) | Gene Copy/ L | Mean Gene Copy /L* |
|------------|-------|--------|----------------------------|--------------|--------------------|
| 2011/7/28  | 32.19 | 0.9360 | 1.5984                     | 4.9E+08      | 4.7E+08            |
|            | 32.23 | 0.9130 | 1.5591                     | 4.8E+08      |                    |
|            | 32.37 | 0.8390 | 1.4327                     | 4.4E+08      |                    |
| 2011/9/23  | 32.79 | 0.6490 | 1.7209                     | 5.3E+08      | 4.8E+08            |
|            | 33.25 | 0.4940 | 1.3099                     | 4.0E+08      |                    |
|            | 32.91 | 0.6050 | 1.6042                     | 5.0E+08      |                    |
| 2011/10/2  | 30.82 | 2.1300 | 4.2845                     | 1.3E+09      | 1.4E+09            |
|            | 30.71 | 2.2800 | 4.5862                     | 1.4E+09      |                    |
|            | 30.64 | 2.3800 | 4.7874                     | 1.5E+09      |                    |
| 2011/10/5  | 31.58 | 1.3500 | 2.1716                     | 6.7E+08      | 6.9E+08            |
|            | 31.63 | 1.3100 | 2.1072                     | 6.5E+08      |                    |
|            | 31.42 | 1.4800 | 2.3807                     | 7.4E+08      |                    |
| 2011/10/9  | 34.13 | 0.2890 | 0.5619                     | 1.7E+08      | 1.4E+08            |
|            | 34.45 | 0.2380 | 0.4628                     | 1.4E+08      |                    |
|            | 34.91 | 0.1810 | 0.3519                     | 1.1E+08      |                    |
| 2011/10/12 | 34.61 | 0.2160 | 0.3456                     | 1.1E+08      | 7.1E+07            |
|            | 37.46 | 0.0386 | 0.0618                     | 1.9E+07      |                    |
|            | 34.96 | 0.1750 | 0.2800                     | 8.6E+07      |                    |
| 2011/10/19 | 34.14 | 0.2870 | 0.4888                     | 1.5E+08      | 1.4E+08            |
|            | 34.39 | 0.2480 | 0.4224                     | 1.3E+08      |                    |
|            | 34.41 | 0.2450 | 0.4173                     | 1.3E+08      |                    |
| 2011/10/30 | 32.23 | 0.9110 | 1.2497                     | 3.9E+08      | 3.6E+08            |
|            | 32.07 | 1.0000 | 1.3717                     | 4.2E+08      |                    |
|            | 32.76 | 0.6610 | 0.9067                     | 2.8E+08      |                    |

The average dsDNA MW used here was 650. The genome size of particle associated bacteria was assumed to be 3MB. The average genome mass of particle associated bacteria is thus  $650 \times 3 \text{ MB} / (6.022 \times 10^{-23}) = 3.238 \times 10^{-6} \text{ ng/genome}$ . The gene copy number /mL sample =  $\text{SQ in ng/mL} / (3.537 \times 10^{-6})$ . The Gene copy number was then converted to per L ( $\times 1000$ ).

**Table S7.** Free-Living (0.2 µm membrane) *asbEII* Containing Bacteria Gene Copy Number

| Time Point | Ct    | SQ     | SQ (filtration correction) | Gene Copy /L | Mean Gene Copy /L* |
|------------|-------|--------|----------------------------|--------------|--------------------|
| 2011/7/28  | 34.68 | 0.0035 | 0.0060                     | 3.5E+06      | 3.6E+06            |
|            | 34.57 | 0.0037 | 0.0064                     | 3.7E+06      |                    |
|            | 36.02 | 0.0019 | 0.0032                     | 1.8E+06      |                    |
| 2011/9/23  | 39.78 | 0.0003 | 0.0008                     | 4.7E+05      | 5.6E+05            |
|            | 39.52 | 0.0003 | 0.0009                     | 5.3E+05      |                    |
|            | 38.95 | 0.0005 | 0.0012                     | 6.9E+05      |                    |
| 2011/10/2  | 36.87 | 0.0012 | 0.0026                     | 1.5E+06      | 1.6E+06            |
|            | 36.78 | 0.0013 | 0.0027                     | 1.6E+06      |                    |
|            | 36.79 | 0.0013 | 0.0027                     | 1.6E+06      |                    |
| 2011/10/5  | 40.96 | 0.0002 | 0.0003                     | 1.6E+05      | 1.9E+05            |
|            | 40.85 | 0.0002 | 0.0003                     | 1.7E+05      |                    |
|            | 40.19 | 0.0002 | 0.0004                     | 2.3E+05      |                    |
| 2011/10/9  | 40.03 | 0.0003 | 0.0005                     | 3.2E+05      | 4.4E+05            |
|            | 39.15 | 0.0004 | 0.0008                     | 4.9E+05      |                    |
|            | 39.04 | 0.0004 | 0.0009                     | 5.1E+05      |                    |
| 2011/10/12 | 39.10 | 0.0004 | 0.0007                     | 3.9E+05      | 5.0E+05            |
|            | 38.37 | 0.0006 | 0.0010                     | 5.5E+05      |                    |
|            | 38.32 | 0.0006 | 0.0010                     | 5.7E+05      |                    |
| 2011/10/19 | 42.24 | 0.0001 | 0.0002                     | 9.1E+04      | 1.2E+05            |
|            | 41.54 | 0.0001 | 0.0002                     | 1.3E+05      |                    |
|            | 41.40 | 0.0001 | 0.0002                     | 1.4E+05      |                    |
| 2011/10/30 | 41.00 | 0.0002 | 0.0002                     | 1.4E+05      | 1.7E+05            |
|            | 40.62 | 0.0002 | 0.0003                     | 1.6E+05      |                    |
|            | 40.07 | 0.0003 | 0.0004                     | 2.1E+05      |                    |

The average dsDNA MW used here was 650 . The genome size of free-living bacteria was assumed to be 1.6MB. The average genome mass of free living bacteria is thus  $650 \times 1.6 \text{ MB} / (6.022 \times 10^{23}) = 1.727 \times 10^{-6} \text{ ng/genome}$ . The gene copy number /mL sample =  $\text{SQ in ng/mL} / (1.727 \times 10^{-6})$ . The Gene copy number was then converted to per L ( $\times 1000$ ). The red highlight is apparent outlier and eliminated from analysis.

**Table S8.** Particle Associated (0.8 µm membrane) *asbEII* Containing Bacteria Gene Copy Number.

| Time Point | Ct    | SQ     | SQ (filtration correction) | Gene Copy/ L | Mean Gene Copy /L* |
|------------|-------|--------|----------------------------|--------------|--------------------|
| 2011/7/28  | 35.44 | 0.0025 | 0.0042                     | 1.3E+06      | 1.1E+06            |
|            | 36.33 | 0.0016 | 0.0027                     | 8.4E+05      |                    |
|            | 35.59 | 0.0023 | 0.0039                     | 1.2E+06      |                    |
| 2011/9/23  | 37.57 | 0.0009 | 0.0023                     | 7.2E+05      | 9.4E+05            |
|            | 35.96 | 0.0019 | 0.0051                     | 1.6E+06      |                    |
|            | 38.14 | 0.0007 | 0.0018                     | 5.5E+05      |                    |
| 2011/10/2  | 36.78 | 0.0013 | 0.0026                     | 8.0E+05      | 9.8E+05            |
|            | 36.13 | 0.0018 | 0.0036                     | 1.1E+06      |                    |
|            | 36.26 | 0.0017 | 0.0033                     | 1.0E+06      |                    |
| 2011/10/5  | 37.69 | 0.0008 | 0.0013                     | 4.1E+05      | 3.9E+05            |
|            | 37.80 | 0.0008 | 0.0013                     | 3.9E+05      |                    |
|            | 37.95 | 0.0007 | 0.0012                     | 3.6E+05      |                    |
| 2011/10/9  | 36.81 | 0.0013 | 0.0025                     | 7.6E+05      | 7.0E+05            |
|            | 37.05 | 0.0011 | 0.0022                     | 6.8E+05      |                    |
|            | 37.07 | 0.0011 | 0.0022                     | 6.7E+05      |                    |
| 2011/10/12 | 38.83 | 0.0005 | 0.0008                     | 2.4E+05      | 1.5E+05            |
|            | 43.40 | 0.0001 | 0.0001                     | 2.6E+04      |                    |
|            | 39.47 | 0.0004 | 0.0006                     | 1.7E+05      |                    |
| 2011/10/19 | 38.12 | 0.0007 | 0.0011                     | 3.6E+05      | 3.0E+05            |
|            | 38.50 | 0.0006 | 0.0010                     | 2.9E+05      |                    |
|            | 38.75 | 0.0005 | 0.0008                     | 2.6E+05      |                    |
| 2011/10/30 | 33.24 | 0.0071 | 0.0098                     | 3.0E+06      | 2.6E+06            |
|            | 33.73 | 0.0056 | 0.0077                     | 2.4E+06      |                    |
|            | 33.59 | 0.0060 | 0.0083                     | 2.6E+06      |                    |

The average dsDNA MW used here was 650. The genome size of particle associated bacteria was assumed to be 3MB. The average genome mass of particle associated bacteria is thus  $650 \times 3 \text{ MB} / (6.022 \times 10^{-23}) = 3.238 \times 10^{-6} \text{ ng/genome}$ . The gene copy number /mL sample = SQ in ng/mL /  $(3.537 \times 10^{-6})$ . The Gene copy number was then converted to per L (x1000).
